# Supplementary material for: An ionic liquid modified dummy molecularly imprinted polymer as a solid-phase extraction material for the simultaneous determination of nine organochlorine pesticides in environmental and food samples
Source: Royal Society of Chemistry journal article supplement (doi:10.1039/c3ay41083h), 2013-01-01
Supplement: c3ay41083h.pdf [file c3ay41083h.pdf]

Ionic liquid modified dummy molecularly imprinted polymer as  
solid-phase extraction material for simultaneous determination of nine  
organochlorine pesticides in environmental and food samples

***For Analytical Methods***

Xiaoyu Gao, Mingfei Pan, Guozhen Fang, Wei Jing, Shaoyuan He and Shuo Wang\*

Key Laboratory of Food Nutrition and Safety, Ministry of Education, Tianjin Key  
Laboratory of Food Nutrition and Safety, Tianjin University of Science and  
Technology, Tianjin, 300457, China.

\*Corresponding author: Shuo Wang

E-mail: [s.wang@tust.edu.cn](mailto:s.wang@tust.edu.cn)

**Fig.S1** Mass spectrum of synthesized SilprImN in positive ion mode

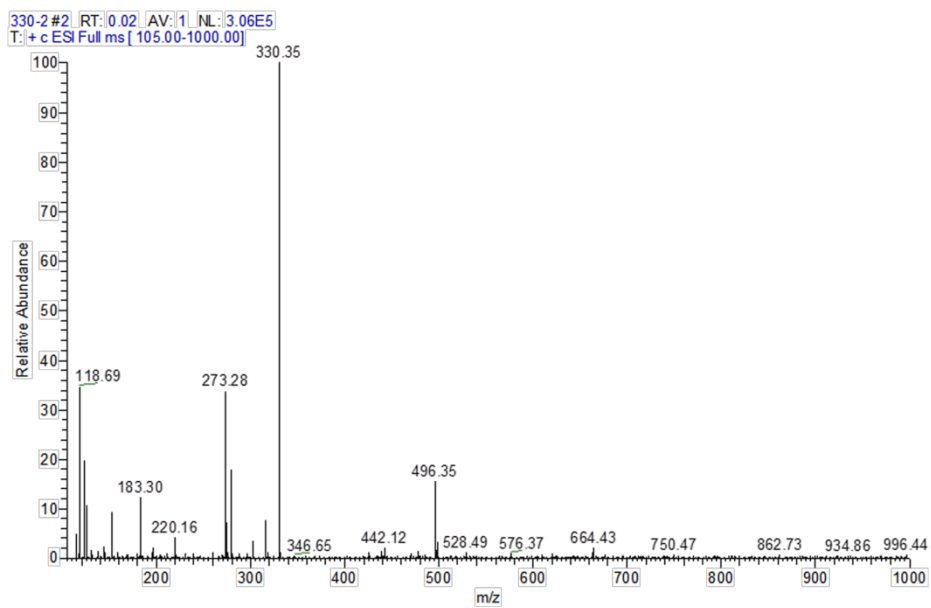

**Fig.S2** The effect of sample loading solution pH to the SilprImN-DMIP-SPE process

for OCPs

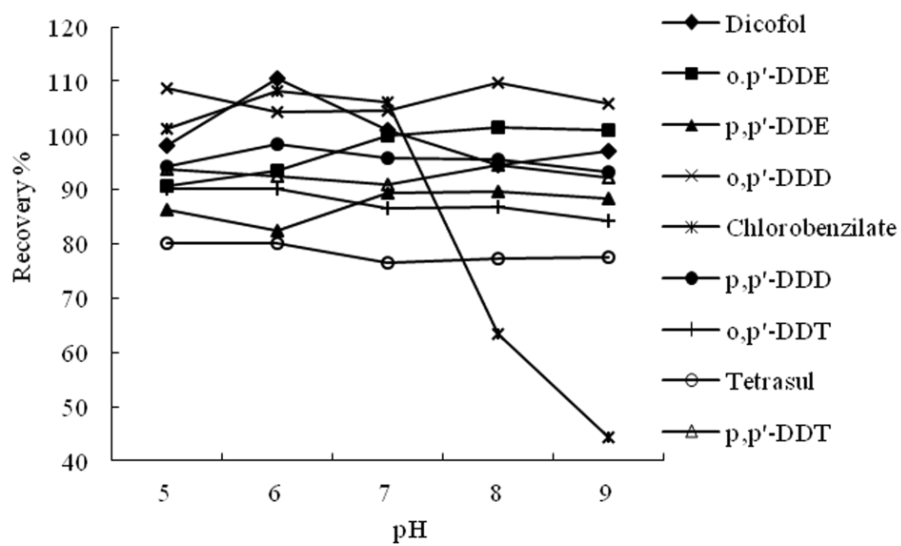

**Fig.S3** The effect of sample flow rate on the SilprImN-DMIP-SPE for the OCPs

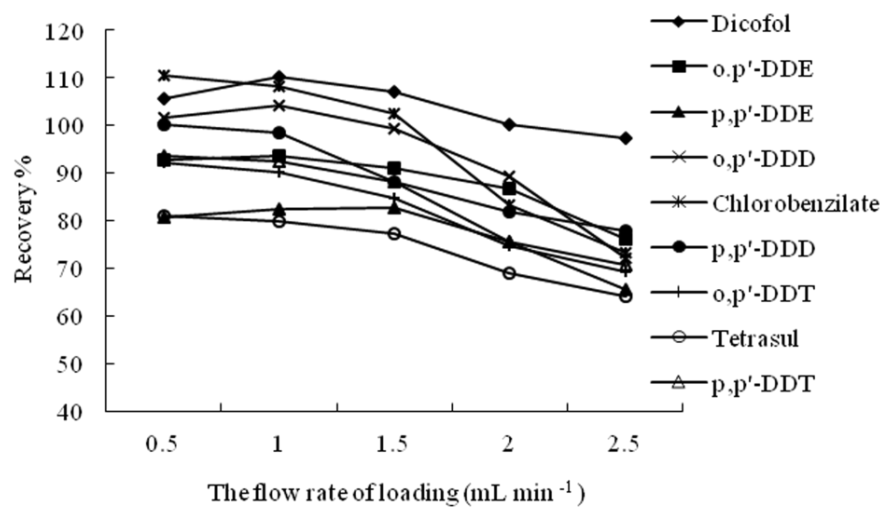

**Fig.S4** The effect of different eluent solvents to the efficiency of SilprImN-DMIP-SPE for the OCPs

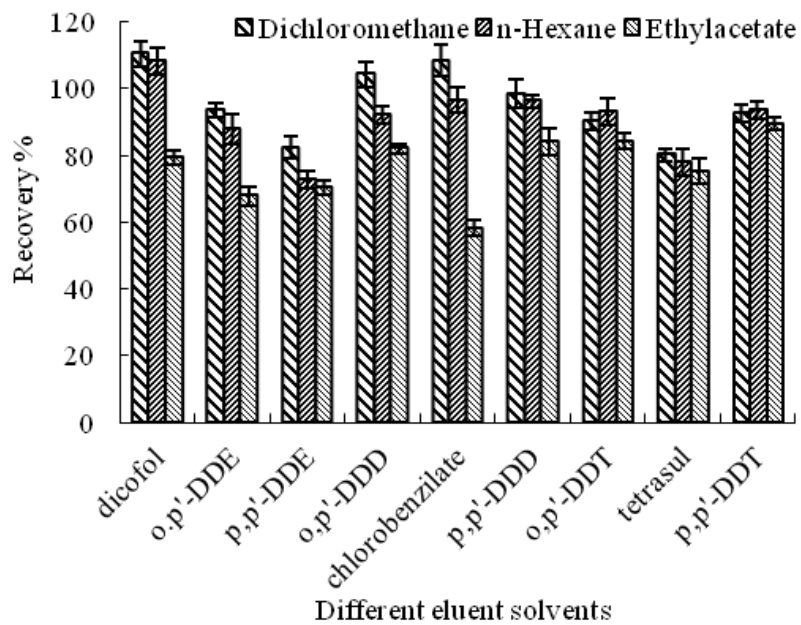

**Fig.S5** The effect of different eluting solvents to the efficiency of SilprImN-DMIP-SPE for the OCPs

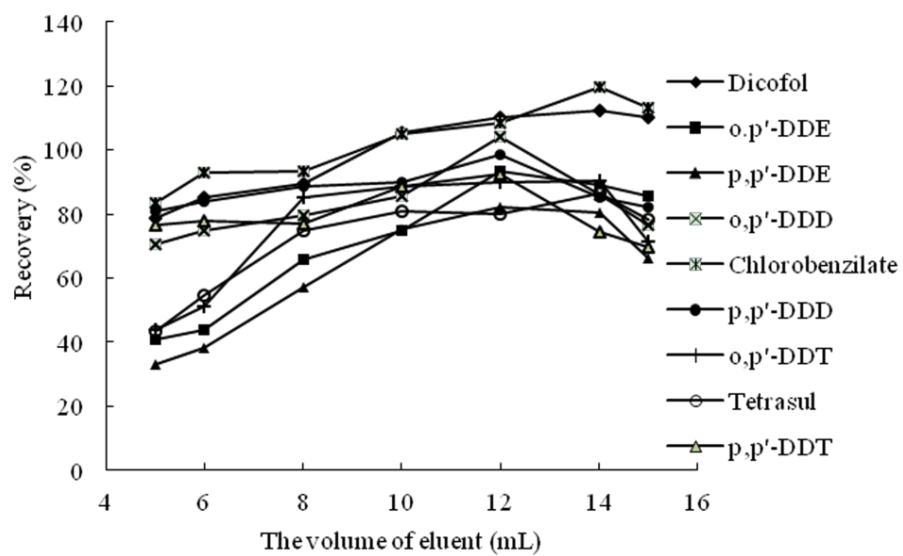

**Table S1** The comparison of SPE results on SilprImN-DMIP, SilprImN-NIP and C<sub>18</sub> cartridges for nine OCPs

| OCPs            | SilprImN-DMIP-SPE | SilprImN-NIP-SPE |       | C <sub>18</sub> -SPE |      |
|-----------------|-------------------|------------------|-------|----------------------|------|
|                 | recovery (%)      | recovery (%)     | $k^a$ | recovery (%)         | $k$  |
| dicofol         | 110.37            | 65.47            | 1.69  | 94.94                | 1.16 |
| o,p'-DDE        | 93.57             | 55.26            | 1.69  | 82.01                | 1.14 |
| p,p'-DDE        | 82.36             | 45.34            | 1.82  | 73.90                | 1.11 |
| o,p'-DDD        | 104.28            | 69.74            | 1.50  | 85.08                | 1.23 |
| o,p'-DDT        | 90.09             | 45.64            | 1.97  | 58.18                | 1.55 |
| tetrasul        | 80.04             | 48.70            | 1.64  | 72.25                | 1.16 |
| chlorobenzilate | 108.30            | 38.51            | 2.81  | 80.25                | 1.35 |
| p,p'-DDD        | 98.42             | 62.97            | 1.56  | 91.46                | 1.08 |
| p,p'-DDT        | 92.58             | 58.58            | 1.58  | 62.23                | 1.49 |

a)  $k=r/r'$ , where  $r$ ,  $r'$  represent the recovery on the DMIP column and NIP/C<sub>18</sub> column, respectively.
